# Supplementary material for: Ad26 vector-based COVID-19 vaccine encoding a prefusion-stabilized SARS-CoV-2 Spike immunogen induces potent humoral and cellular immune responses
Source: PubMed Central journal article supplement (PMC7522255; doi:10.1038/s41541-020-00243-x), 2020-09-28
Supplement: 41541_2020_243_MOESM1_ESM.pdf [file 41541_2020_243_MOESM1_ESM.pdf]

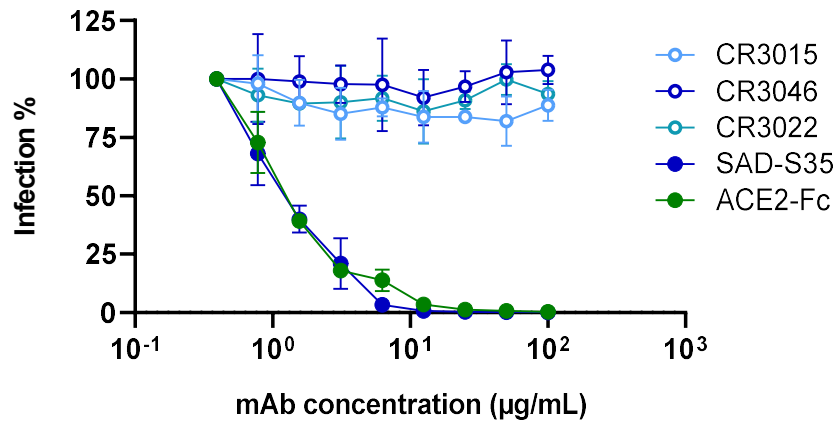

**Supplementary Figure 1. Antibody-mediated neutralization of MLV particles pseudotyped with S protein of SARS-CoV-2.** Pseudotyped MLV particles pre-incubated with monoclonal antibodies or soluble receptor ACE2-Fc in a concentration range were used to transduce Vero E6 cells. The luminescence signal of the luciferase activity in transduced Vero E6 cells was measured 40 h post transduction to calculate the infection (%) of the Vero E6 cells relative to non-treated MLV particles.

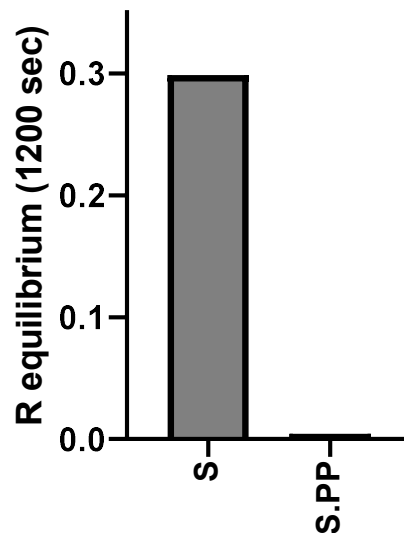

**Supplementary Figure 2. Shedding of SARS-CoV-2 S1.** Biolayer interferometry to determine the binding of ACE2 to Expi293F cell culture supernatants expressing S and S.PP three days after transfection.

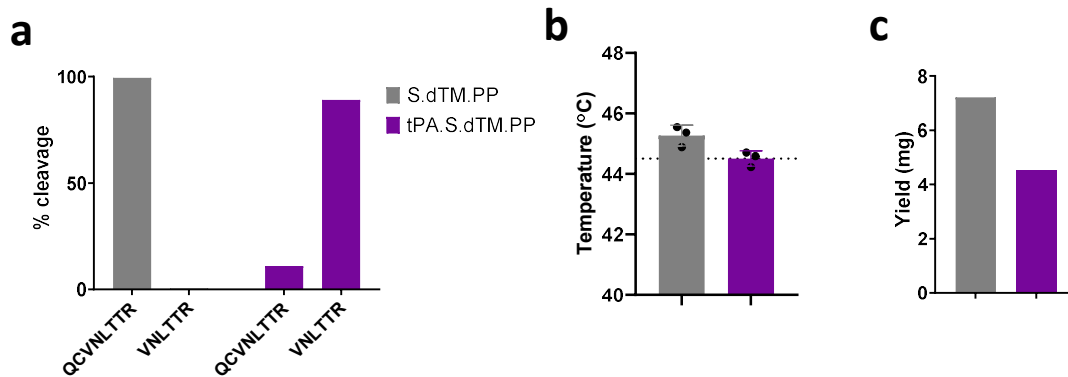

**Supplementary Figure 3. Soluble protein characterization.** **a)** Percentage of SP cleavage at cleavage site 1 (CS1) resulting in peptide QCVNLTTR and at cleavage site 2 (CS2) resulting in peptide VNLTTTR (see Fig 3A) as determined with mass-spectrometry. **b)** Melting temperature determined with DSF (n=3). The dotted horizontal line indicates the height of the  $T_{m_{50}}$  of tPAs.S.dTM.PP. Data are represented as mean  $\pm$ SD and with the separate three data points. **c)** Protein yield per 900 ml culture for secreted S proteins.

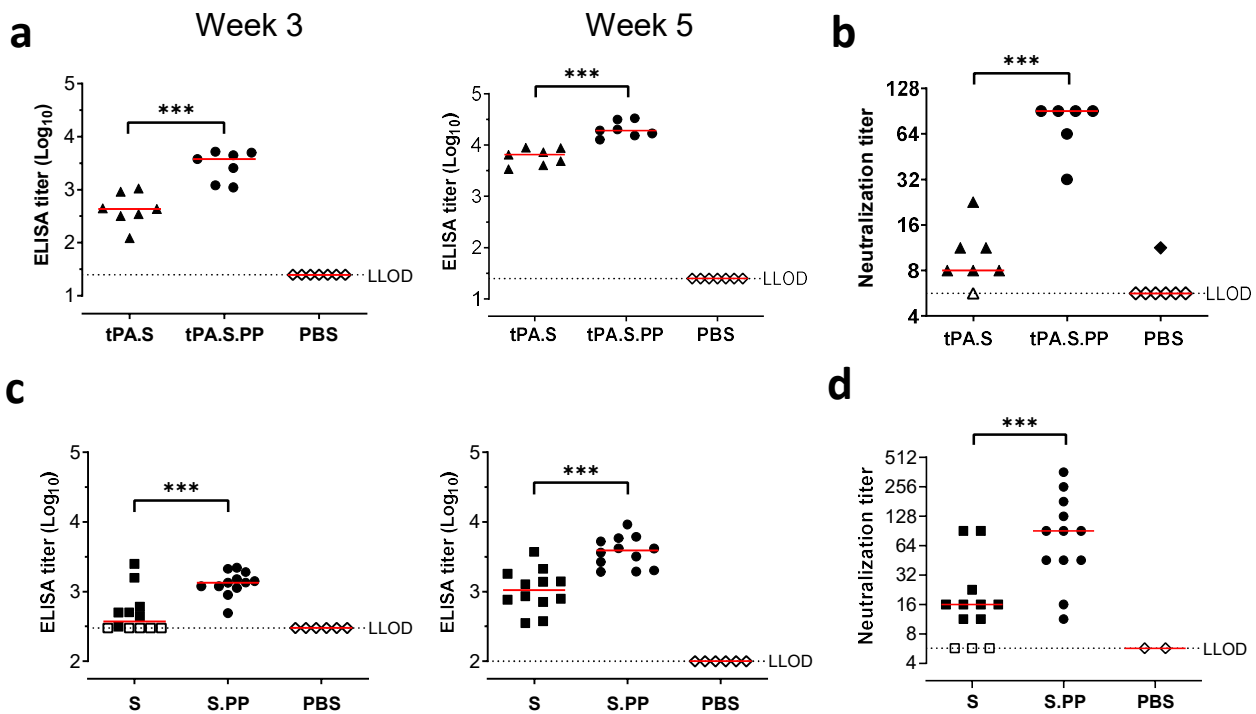

**Supplementary Fig 4. S protein-specific antibody binding titers and SARS-CoV-2 NABs induced by DNA immunization.** Naïve mice (BALB/c) were immunized twice, 3 weeks apart (Week 0 and Week 3), with 100 µg of DNA constructs. Serum samples were taken prior to the second immunization (Week 3), and 2 weeks after the second immunization (Week 5). Spike protein-specific binding and SARS-CoV-2 NAb titers were determined. In two separate experiments, mice were immunized with either **a + b**) tPA.S (N=7), tPA.S.PP (N=7), or PBS (N=7), or **c + d**) were immunized with either S (N=12), S.PP (N=12), or with PBS (N=6). Spike protein binding antibody titers were measured by ELISA. SARS-CoV-2 NAb titers were measured by wt VNA determining inhibition of the cytopathic effect (CPE) of virus isolate Leiden1 (L-0001) on Vero E6 cells. Mice immunized with PBS were taken along as two separate pools in fig S2d. The median response per group is indicated with a horizontal line. The dotted lines indicate LLODs. Animals with a response at or below the LLOD were put on LLOD and are shown as open symbols. Statistically significant differences as determined by z-test from Tobit ANOVA are indicated by asterisks ; \*\*:  $p < 0.01$ , \*\*\* $p < 0.001$ .

## a CD8<sup>+</sup> T cells

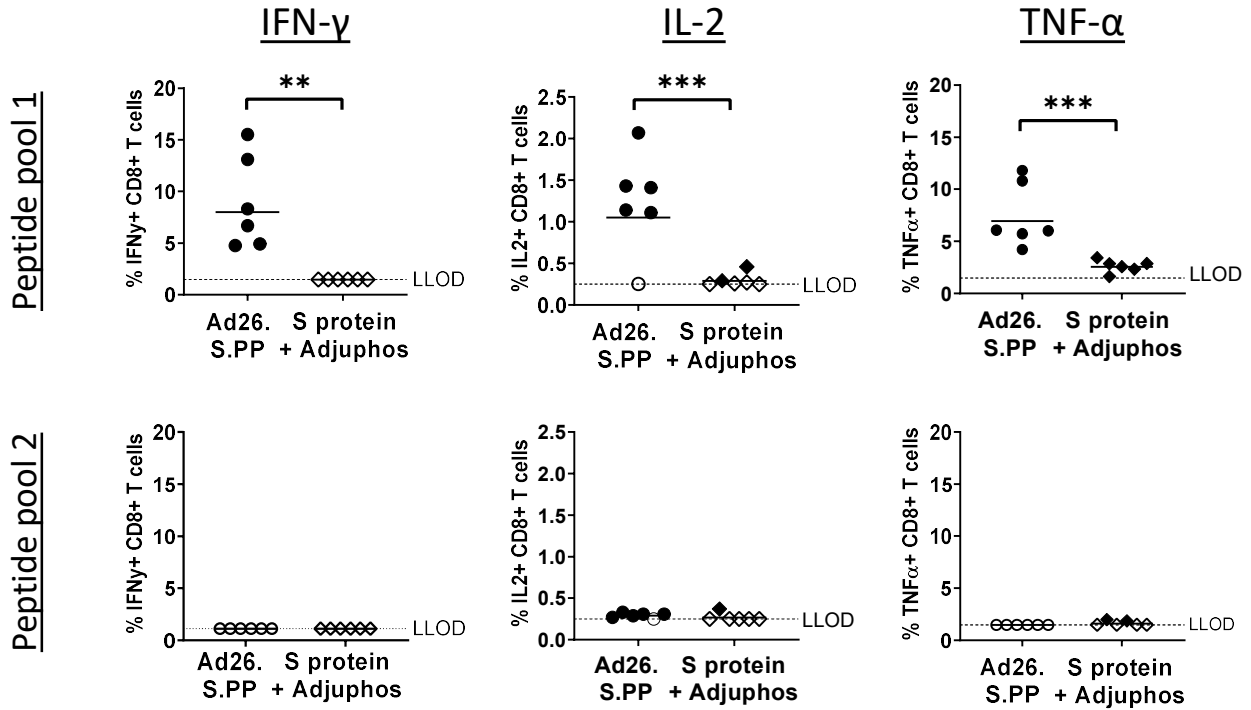

## b CD4<sup>+</sup> T cells

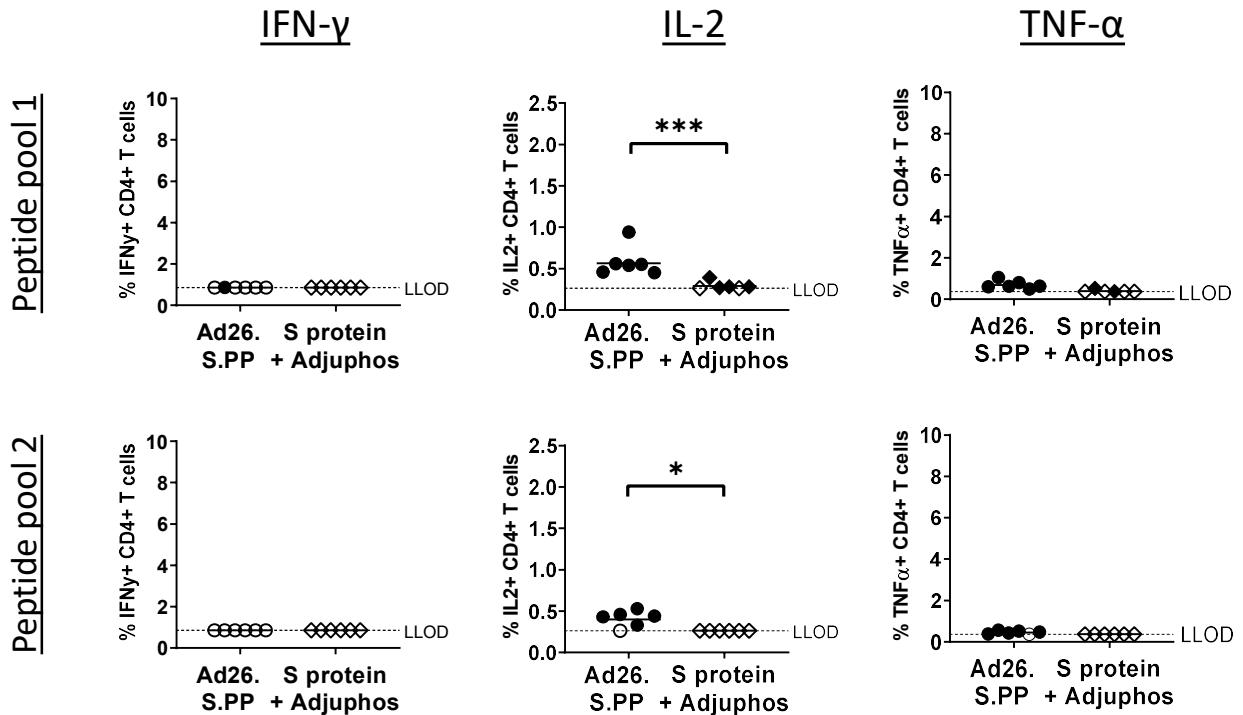

**Supplementary Fig 5. Th1 associated cytokines induced by Ad26.S.PP compared with Adjuvphos adjuvanted protein.** Naïve mice (BALB/c, N=6 per group) were immunized with either  $10^{10}$  vp of Ad26.S.PP or 50 mcg of Spike protein adjuvanted with 100 µg Adjuvphos (Adju-Phos®). Two weeks after immunization splenocytes were analyzed for intracellular cytokine expression of IFN- $\gamma$ , IL-2 and TNF- $\alpha$  after stimulation with SARS-CoV-2 Spike protein peptides. **a)** CD8 positive T cells and **b)** CD4 positive T cells were stimulated with either S protein peptide pool 1 or peptide pool 2.

The median response per group is indicated with a horizontal line. The dotted lines indicate LLODs. Animals with a response at or below the LLOD were put on LLOD and are shown as open symbols. Statistically significant differences as determined by Mann-Whitney U test, or a z-test from Tobit ANOVA when the majority of samples were above LLOD, indicated by asterisks; \*:p<0.05, \*\*: p<0.01, \*\*\*p<0.001.

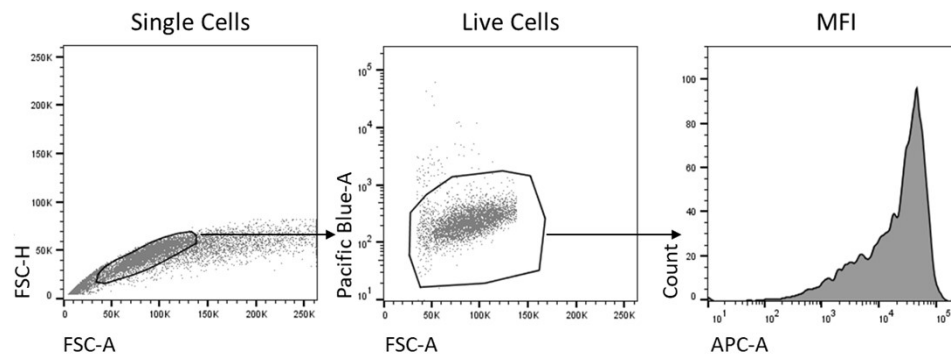

**Supplementary Figure 6. Gating strategy in flow cytometry (see Fig. 2a).** Gating on MRC-5 single, live cells, to obtain median fluorescence intensity in APC channel. Example shown is S309 binding to tPA.S.PP.

| ID number | name            | sequence               |
|-----------|-----------------|------------------------|
| 2972      | CAG4 rv         | CCACGGGACGGGCTC        |
| 4146      | COR Fw1         | AAGATCTACAGCAAGCACAC   |
| 4147      | COR Fw2         | AACAGCAACAACCTGGACTC   |
| 4148      | COR Fw3         | GTGCCAGCTACCAGACACAG   |
| 4149      | COR Fw4         | TCCCCTTTGCTATGCAGATG   |
| 4150      | COR Fw5         | CAGCTTCAAAGAGGAACTGG   |
| 4151      | COR Rv1         | AACAGGTCTGGGTAGAGTG    |
| 4152      | COR Rv2         | ATCTGGTGGCATTGAACACC   |
| 4153      | COR Rv3         | TCTTGTGCTCTCTGTCAGC    |
| 4154      | COR Rv4         | GTCTTGTAGATCTGCTTCAC   |
| 4155      | COR Rv5         | TTGGCAGAGGCTCTAATCTC   |
| 4170      | WH-CoV_TGseq_1  | GCGCGAAAAGTGAATGAGGAA  |
| 4171      | WH-CoV_TGseq_2  | TGTTCCCATAGTAACGCCAAT  |
| 4172      | WH-CoV_TGseq_3  | GTGTACGGTGGGAGGTCTATA  |
| 4174      | WH-CoV_TGseq_5  | TCACTGCATTCTAGTTGTGGTT |
| 4175      | WH-CoV_TGseq_6  | ATCATCGCCGAGGAGAAACT   |
| 4176      | WH-CoV_TGseq_7  | GGAAAGTCCCTATTGGCGTTAC |
| 4177      | WH-CoV_TGseq_8  | CCGCATCACCATGGTAATAGC  |
| 4178      | WH-CoV_TGseq_9  | TATAGACCTCCCACCGTACAC  |
| 4179      | WH-CoV_TGseq_10 | CGGGCAGCTTGTAGTTGTAAT  |
| 4180      | WH-CoV_TGseq_11 | ACCACAAGTGAATGCAGTGA   |
| 4181      | WH-CoV_TGseq_12 | AGTTTCTCCTCGGCGATGAT   |
| 4182      | WH-CoV_TGseq_13 | AACATCGCCAACCTCAAGATC  |
| 4183      | WH-CoV_TGseq_14 | GGTCATCAAAGTGTGCGAGTT  |
| 4184      | WH-CoV_TGseq_15 | CTACCTGCAGCTAGAACCTT   |
| 4185      | WH-CoV_TGseq_16 | CAATTACCTGTACCGGCTGTT  |
| 4186      | WH-CoV_TGseq_17 | GACGTGAACTGTACCGAAGTG  |
| 4187      | WH-CoV_TGseq_18 | ACAGGACAAGAACCCCAAGA   |
| 4188      | WH-CoV_TGseq_19 | TCGGCAAGATCCAGGACAG    |
| 4189      | WH-CoV_TGseq_20 | CAGATCATCACACCGACAAC   |
| 4190      | WH-CoV_TGseq_21 | AGCCTCTGATGATGTTGGACT  |
| 4191      | WH-CoV_TGseq_22 | AAGGTTCTAGGCTGCAGGTAG  |
| 4192      | WH-CoV_TGseq_23 | GGGCAGCTTGTAGTTGTAGTC  |
| 4193      | WH-CoV_TGseq_24 | CTTCGGTACAGTTCACGTCCT  |
| 4194      | WH-CoV_TGseq_25 | CTCTGGGTGTTCTTGTCTG    |
| 4195      | WH-CoV_TGseq_26 | GTTGAACTGGTTGGCGATCA   |
| 4196      | WH-CoV_TGseq_27 | GTTGTCGGTGGTGTATGATCTG |
| 4197      | WH-CoV_TGseq_28 | AACAGCCGGTACAGGTAATTG  |
| 4198      | WH-CoV_TGseq_29 | GCTGGGCATGTAGCTCGA     |
| 4199      | WH-CoV_TGseq_30 | AGCGACGAGTCCCCACG      |

**Supplementary Table 1.** Primers used for PCR of Ad26 vaccine vectors to confirm the identity and integrity of the SARS-COV-2 Spike genes.

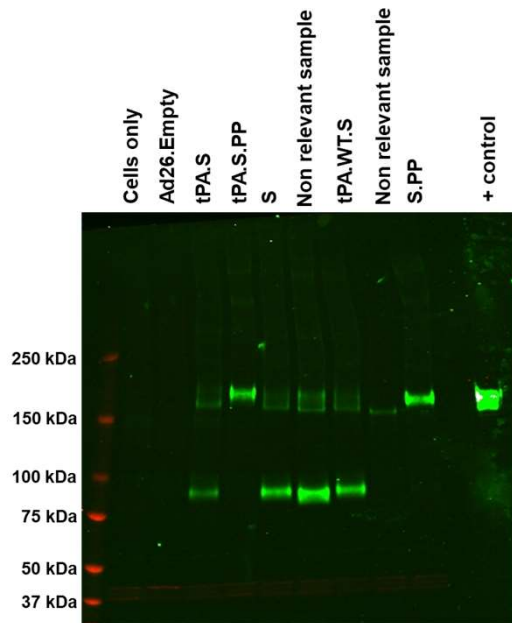

**Supplementary Fig 7.** Western blot analysis for expression from Ad26 vaccine vectors encoding tPA.S, tPA.S.PP, S, tPA.WT.S, and S.PP in MRC-5 cell lysates under non-reduced conditions using a human monoclonal antibody (CR3046). Ad26.Empty was included as negative control. SARS-CoV-2 S protein was included as positive control.



**a**

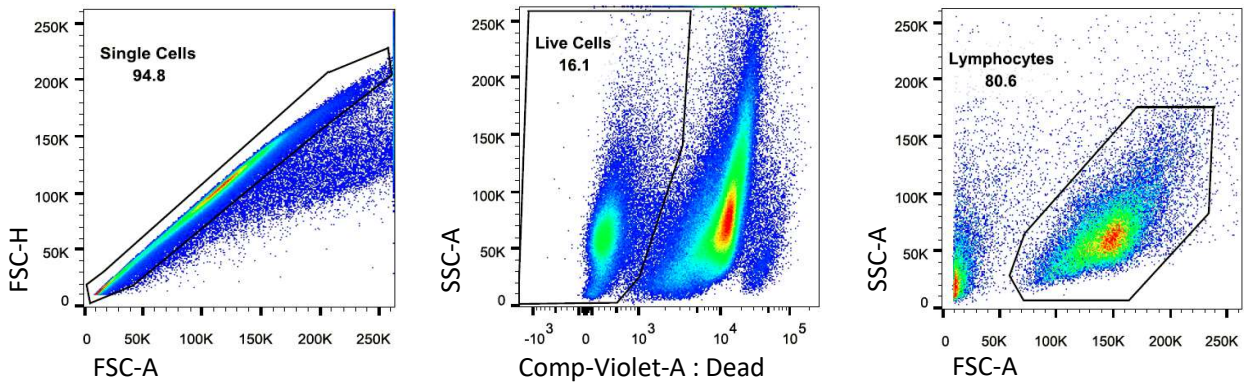

**b**

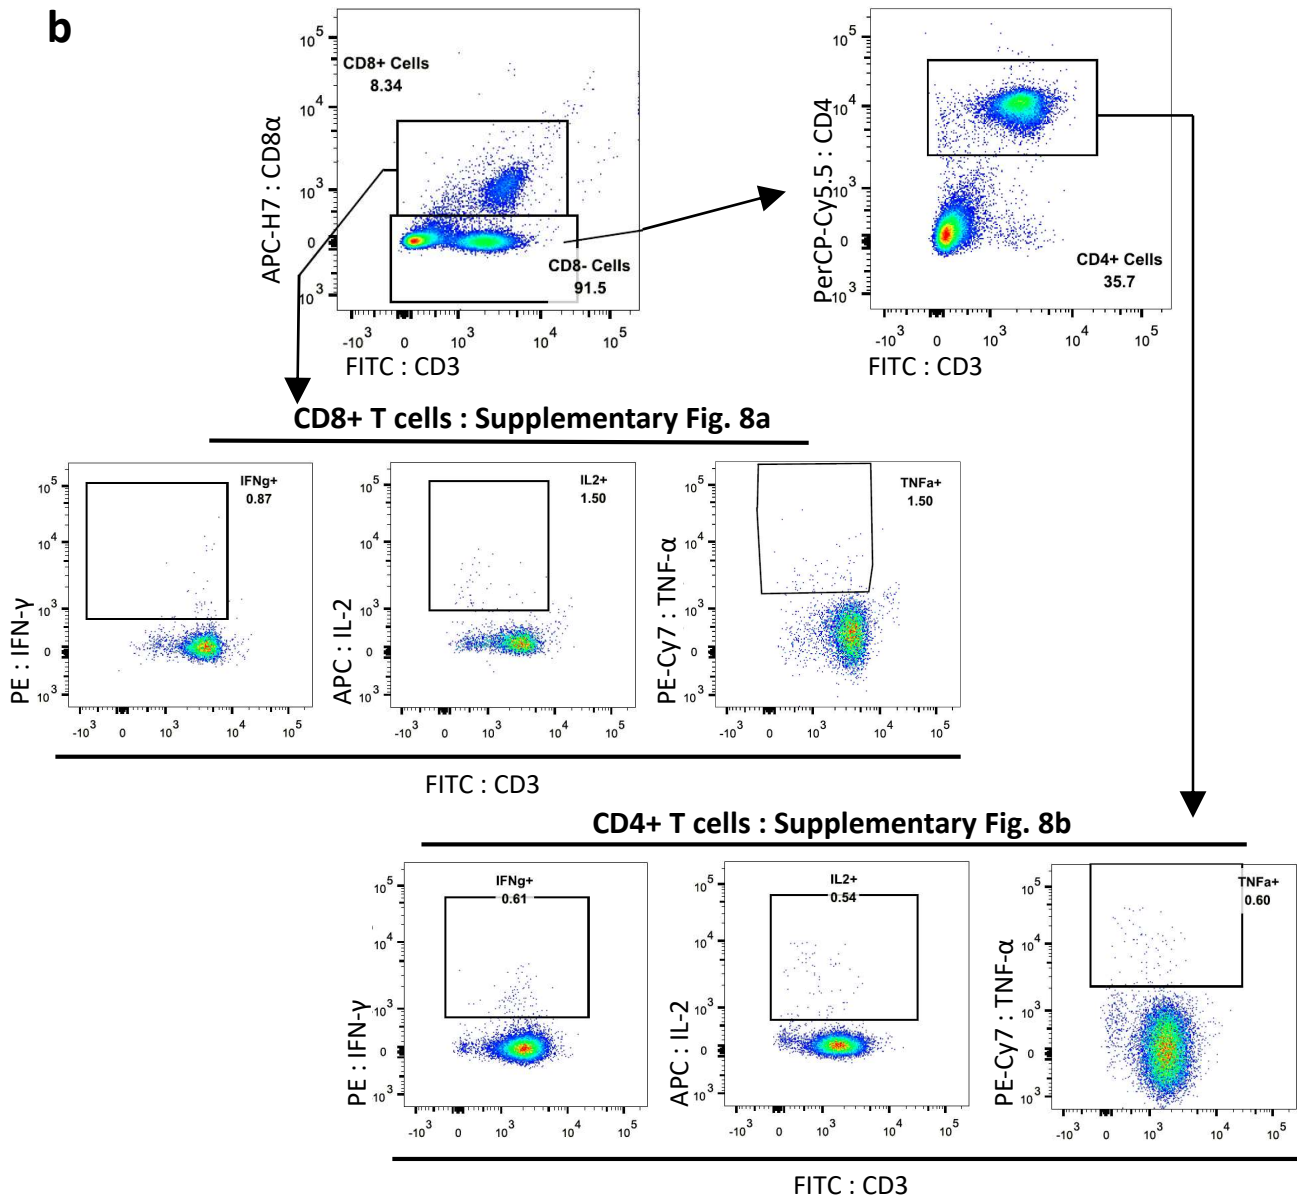

**Supplementary Fig 8. Gating strategy used for ICS assay.** Spleens were harvested and splenocytes were analyzed for intracellular cytokine expression of IFN- $\gamma$ , IL-2 and TNF- $\alpha$  after stimulation with SARS-CoV-2 Spike protein peptide pools. **a)** Single cells were selected by the FSC-A to FSC-H ratio, after which stained dead cells were excluded and lymphocytes selected. **b)** Subsequently, CD8<sup>+</sup> T cells were selected by a positive CD8 staining, while CD4<sup>+</sup> T cells were selected by a negative CD8 staining followed by a positive CD4 staining. Percentage of cytokine producing cells were measured by IFN- $\gamma$ , IL-2 and TNF- $\alpha$  markers.
